# Supplementary material
Source: publisher site journal article supplement (https://mycokeys.pensoft.net/article/27310/download/suppl/32/)
Supplement: Supplementary file 1

Supplementary file S2 Table 2.List of taxa presented in the phylogenetic analyses with GenBank accession numbers for the ITS and 28S sequences. (T) indicates type specimen. In bold new generated sequences.

| Species | Strain/ Specimen | Location | Host | Genbank accession numbers | |
| --- | --- | --- | --- | --- | --- |
| ITS | 28S |
| *Arambarria cognata* | CIEFAPcc 192/ MR11172 (T)  CGP474 | Argentina, Chubut, Lago Puelo  Uruguay, Canelones, Atlántida | *Diostea juncea*  *Dodonaea viscosa* | AY072033  KY907682 | KP347520  KY907692 |
| *Arambarria* sp. | STE7109 (Taxon 3) | South Africa, Constantia | *Vitis vinifera* | KP279300 | - |
| STE7178 (Taxon 3) | South Africa, Grabouw | *Vitis vinifera* | JQ038896 | - |
| *Fomitiporella americana* | CIEFAPcc 88  CIEFAPcc 107  Basidiomycota Achao50  CIEFAPcc 515/ MR12543  CIEFAPcc 516/ MR12544  CIEFAPcc582/ MR12602  CIEFAPcc 592/ MR12615  CIEFAPCC594/ MR12618  CIEFAPCC 595/ MR12619 | Argentina, Chubut, Los Cipreses  Argentina Chubut, Los Cipreses  Chile, Chiloé  Chile, Bío-Bío, Reserva Nonguén  Chile, Bío-Bío, Reserva Nonguén  Chile, Los Lagos, Llanquihe,  Reserva Katalapi  Chile, Bío-Bío, Reserva Nonguén  Chile, Bío-Bío, Reserva Nonguén  Chile, Araucanía, Parque  Nacional Nahuelbuta | *Austrocedrus chilensis*  *Austrocedrus chilensis*  Historic Wood  Angiosperm host  *Cryptocarya alba*  Angiosperm host  Angiosperm host  *Cryptocarya alba*  *Luma apiculata* | KP347536  KP347537  KF638515  **MH698970MH698971**  -  **MH698972**  -  **MH698973** | KP347524  KP347525  -  **MH698964**  **MH698965**  **MH698966**  **MH698967**  **MH698968**  -  - |
| JV 0212/8J  JV0904/149J | USA  USA | *-*  *-* | KX181292  KX181293 | **-**  KX181329 |
|  |  |  |  |  |
| *F. austroasiana* | Dai 17879  Dai 16244 (T) | Singapore  China | -  - | MG657330  MG657328 | MG657324  MG657320 |
| *F. caryophylli* | CBS 448.76 | India | *-* | AY558611 | AY059021 |
| *F. cavicola* | N153 | UK | *-* | - | AY059052 |
| *F. caviphila* | LWZ 20130812-1 (T) | China, Zhejiang, Gutihanshan Nat’l Nature Reserve | *Quercus phillyraeoides* | - | KF729937 |
| *F. chinensis* | LWZ 20130713-7 | China | - | KJ787817 | KJ787808 |
| LWZ 20130916-3 | China | - | KJ787818 | KJ787809 |
| *F. inermis* | L-15290  JV1009/56 | Arizona, USA  USA, Pennsylvania | *Ilex mucronata*  *Ilex mucronata* | **MH698974**KX181306 | **MH698969**KX181347 |
| *F. mangrovei*  *F. micropora*  *F. resupinata*  *F. sinica*  *F. subinermis*  *F. tenuissima*  *F. umbrinella*  *F. vietnamensis*  *Fomitiporella* sp.2  *Fomitiporella* sp.3  *Fomitiporella* sp.4  *Fomitiporella* sp.5  *Fomitiporella* sp.7  *Fomitiporella* sp.8  *Fomitiporella* sp.9  *Fomitiporella* sp.10  *Fomitiporella* sp.  *Fomitiporella* sp. | JV 1008/60 (BJFC) (T) | Florida, USA | *Conocarpus erectus* | KX181313 | KX181334 |
| JV1312/E2J  JV1207/6.1J (T)  Douanla-Meli 476  LWZ 20130809-8  LWZ 20130810-3  Dai 15114 (T)  Dai 15131 | Virgin Island, USA  Virgin Island, USA  Cameroon  China  China  China, Hunan, Yizhang  China, Hunan, Yizhang | *-*  Dead Wood  *Entandrophragma*  *-*  *-*  Angiosperm tree  Angiosperm trunk | KX181294  KX181297  KJ787822  KJ787820  KJ787821  KX181308  KX181307 | KX181333KX181330  JF712935  KJ787811  KJ787812  KX181344  KX181345 |
| Dai 12365  Dai 12245 | China, Yunnan, Puer  China, Yunnan, Puer | Angiosperm trunk  *-* | KC456244  KC456242 | KC999901  KC999902 |
| CBS 303.66  Dai 18377 (T)  Dai 18382  Cui 6557  Cui 11352 | USA, Georgia, Flint River  Vietnam  Vietnam  China  China | Angiosperm tree  Angiosperm tree  Angiosperm tree  -  - | -  MG657332  MG657333  KX181303  KX181315 | AY059036  MG657326  MG657327  -  KX181338 |
| LWZ 20140721-2  LWZ 20140729-22  Oe5 AM12  Oe6 AM15  Oe7 AM18  AM 04  STE-U7141 (Taxon 1)  STE-U7038 (Taxon 1)  STE-U7155 (Taxon 2)  STE-U7147 (Taxon 2) | China  Thailand  Ethiopia  Ethiopia  Ethiopia  Ethiopia  Riebeeck Kasteel, South Africa  Stellenbosch, South Africa  Calitzdorp, South Africa  Oudtshoorn, South Africa | *-*  *-*  *-*  *-*  *-*  *-*  *Vitis vinífera*  *Vitis vinífera*  *Vitis vinífera*  *Vitis vinifera* | KX181316  KX181317  JF895466  JF895467  JF895468  KX181318  KP279295  JQ038891  KP279297  JQ038893 | KX181337  KX181339  JQ910908  JQ910909  JQ910910  KX181335  -  -  -  - |
| *Fomitiporella* sp. | STE-U7142 (Taxon 4) | Stellenbosch, South Africa | *Vitis vinifera* | JQ38898 |  |
| *Fulvifomes indicus*  *F. fastuosus* | O25034  CBS 213.36 | Zimbabwe, Midlands, Mvuma  Philippines, Batangas, Luzon | -  *Gliricidia sepium* | KC879262  AY558615 | KC879259  AY059057 |
|  |  |  |  |  |
| *Inocutis dryophila*   1. *I. jamaicensis* | DLL2012-001  RLG15819-5 | USA, Wisconsin  USA, Arizona, Coronado | *Quercus alba*  *Quercus arizonica* | KU139186  KY907684 | KU139155  KY907703 |
| *Phellinotus neoaridus*  *P. piptadeniae* | URM80362  URM80361 | Brazil, Pernambuco, Serra. Talha  Brazil, Pernambuco, Caruaru | *Caesalpinia* sp.  *Senegalia* sp. | KM211294  KM211288 | KM211286  KM211280 |
| *Phylloporia elegans*  *P. flabelliforma* | FLOR51178  MUCL55569 | Brazil, Santa Catarina, Itapoá  Gabon | Angiosperm tree  *Dichostemma* sp. | KJ639049  KU198356 | KJ631408  KU198349 |
